# Supplementary material
Source: PubMed Central journal article supplement (PMC3057433)
Supplement: NIHMS274754-supplement-1.pdf [file NIHMS274754-supplement-1.pdf]

**Table S1: Biomarkers of Response Currently Used in Cancer Therapy**

| <b>Biomarker</b>                      | <b>Treatment</b>       | <b>Cancer type</b> | <b>Comments</b>                   |
|---------------------------------------|------------------------|--------------------|-----------------------------------|
| Estrogen/progesteron receptor         | hormone therapies      | breast cancer      | biomarker of response             |
| HER2 overexpression/<br>amplification | trastuzumab, lapatinib | breast cancer      | biomarker of response             |
| EGFR mutation                         | erlotinib              | lung cancer        | EGFR positivity is not predictive |
| KRAS mutation                         | cetuximab              | colorectal cancer  | biomarker of resistance           |
| MGMT methylation                      | temozolamide           | glioblastoma       | biomarker of response             |

## Table S2: Current Biomarker Data for Bevacizumab (Bev) Therapy

| Type of cancer | Tx                                                  | Study Phase | Study size / Time-points                                                      | Biomarker findings                                                                                                                                                                                                                                                                      | Reference                                  |
|----------------|-----------------------------------------------------|-------------|-------------------------------------------------------------------------------|-----------------------------------------------------------------------------------------------------------------------------------------------------------------------------------------------------------------------------------------------------------------------------------------|--------------------------------------------|
| Met BC         | Bev + chemo                                         | II          | 21 pts<br>Baseline                                                            | Expression of CD31 and PDGFR $\beta$ in tumor vessels by IHC was significantly associated with response<br>Tumor VEGF showed a trend towards association with response<br>pVEGFR2(Y996), pVEGFR2(Y951), MVD, Ki67, apoptosis, grade, ER, HER-2/neu, and p53 - no association            | Yang et al.,<br>J Clin Oncol 2008          |
| Met NSCLC      | Bev + chemo                                         | II/III      | n = 56-166<br>pre and post (week 7)                                           | Baseline sICAM1 but not sE-sel, VEGF, bFGF - strong independent prognostic factor for OS<br>Trend for a substantial benefit from bevacizumab for patients with a drop in sE-sel levels of <5.35 ng/mL at week 7                                                                         | Dowlati et al., Clin<br>Cancer Res 2008    |
| Ov Ca          | Bev + sorafenib                                     | II          | n = 42<br>pre and post (every 2<br>cycles)                                    | CA125 not a predictive biomarker for targeted therapy                                                                                                                                                                                                                                   | Azad et al, Cancer<br>2008                 |
| rGBM/AA        | Bev + chemo                                         | II          | n = 60<br>Baseline                                                            | High tumor VEGF, increased RR but not OS<br>High CA9, poor OS                                                                                                                                                                                                                           | Sathornsumetee et al,<br>J Clin Oncol 2008 |
| Ov Ca          | Bev + metronomic<br>chemo                           | II          | n = 70<br>Baseline                                                            | VEGF, E-selectin, and thrombospondin-1 - not associated with clinical outcome                                                                                                                                                                                                           | Garcia et al, J Clin<br>Oncol 2008         |
| rGBM           | Bev + chemo                                         | II          | n = 21<br>pre and post (week 1/2, 6)                                          | Both early and later FLT-PET responses were more significant predictors of OS (1 to 2 weeks, P = .006; 6 weeks, P = .002), compared with the MRI responses                                                                                                                              | Chen et al, J Clin<br>Oncol 2007           |
| Met BC         | Bev + chemo                                         | III         | n = 363<br>Baseline                                                           | The VEGF-2578 AA genotype was associated with a superior median OS<br>The VEGF-1154 A allele also demonstrated a superior median OS<br>Two additional genotypes, VEGF-634 CC and VEGF-1498 TT, were associated with significantly less grade 3 or 4 hypertension in the combination arm | Schneider et al, J Clin<br>Oncol 2008      |
| Met CRC        | Bev + chemo                                         | III         | n = 312<br>Baseline                                                           | No statistically significant relationship between VEGF, thrombospondin-2 or microvessel density and the increase in median OS                                                                                                                                                           | Jubb et al, J Clin<br>Oncol 2006           |
| Met CRC        | Bev + chemo                                         | III         | n = 295<br>Baseline                                                           | No statistically significant relationship between mutations of k-ras, b-raf, or p53 and the increase in median OS                                                                                                                                                                       | Ince et al, J Natl<br>Cancer Inst 2005     |
| aRC            | Bev<br>then Bev +<br>chemoradiation<br>then surgery | I/II        | n = 32<br>pre and post (days 3/12<br>mono, day 33 combo, day<br>96 pre-surg ) | Increase in VEGF, PIGF, sVEGFR2, decrease in IFP and MVD<br>CEA - no correlation<br>Baseline sVEGFR1, extent of PIGF and VEGF increase and pre-surgery CECs - potential predictive biomarkers of response                                                                               | Willett et al., JCO<br>2009                |

Met, metastatic; BC, breast cancer; RCC, renal cell carcinoma; sICAM1, soluble inter-cellular adhesion molecule 1; bFGF, basic fibroblast growth factor; VEGF, vascular endothelial growth factor; VEGFR, vascular endothelial growth factor receptor; ER, estrogen receptor; CRC, colorectal cancer; NSCLC, non-small cell lung carcinoma; rGBM, recurrent glioblastoma; Tx, treatment; Ov Ca, ovarian cancer; AA, anaplastic astrocytoma; PFS, progression-free survival; RR, response rate; OS, overall survival; sEsel, soluble E-selectin; FLT-PET, fluorothymidine positron emission tomography; MVD, microvascular density; IFP, interstitial fluid pressure; CPC, circulating progenitor cell; CECs, circulating endothelial cells; CA9, carbonic anhydrase IX

### Table S3: Current Biomarker Data for Sunitinib Therapy

| Type of cancer       | Tx             | Study Phase | Study size / Time-points                             | Biomarker findings                                                                                                                                                                                                                                                                                                                        | Reference                                 |
|----------------------|----------------|-------------|------------------------------------------------------|-------------------------------------------------------------------------------------------------------------------------------------------------------------------------------------------------------------------------------------------------------------------------------------------------------------------------------------------|-------------------------------------------|
| RCC                  | Sunitinib mono |             | n = 26<br>pre and post (day 28)                      | High CD1c/BDCA-1(+) myeloid DC frequencies were predictive for tumor regression and improved PFS                                                                                                                                                                                                                                          | van Crujisen, Clin Cancer Res 2008        |
| RCC (Bev refractory) | Sunitinib mono | II          | n = 61<br>pre and post (day 28)                      | At day 28- significant increase in plasma VEGF and PIGF and decrease in sVEGFR3<br>VEGF and sVEGFR3 returned to near-baseline levels after the 2-week off-treatment period<br>Lower baseline levels of sVEGFR3 and VEGF-C were associated with longer PFS                                                                                 | Rini et al., J Clin Oncol 2008            |
| Met BC               | Sunitinib mono | II          | n = 64<br>pre and post (day 28)                      | Increases in plasma VEGF and decreases in soluble VEGFRs and sol. c-KIT                                                                                                                                                                                                                                                                   | Burstein et al., J Clin Oncol 2008        |
| RCC                  | Sunitinib mono | II          | n = 63<br>pre and post (day 28)                      | At day 28- significant increase in plasma VEGF and PIGF and decrease in sVEGFR2 and sVEGFR3<br>All these markers returned to near-baseline levels after the 2-week off-treatment period                                                                                                                                                   | De Primo et al., J Trans Med 2007         |
| GIST                 | Sunitinib mono | I/II        | n = 73<br>pre and post (day 14)                      | VEGF increased and sVEGFR2 decreased at day 14 and plasma drug levels. VEGF and sVEGFR2 rebounded towards baseline off treatment<br>Patients with clinical benefit had significantly greater increases in CECs and smaller decreases in monocytes                                                                                         | Norden-Zfoni et al., Clin Cancer Res 2007 |
| HCC                  | Sunitinib mono |             | n = 34<br>pre and post (days 14, 28, 56, 84 and 112) | SDF1 $\alpha$ , VEGF and PIGF increased and sVEGFR2, sVEGFR3 and CPCs decreased in circulation<br>Patients with clinical benefit had significantly greater decreases in Ktrans, IL-6 and sol. c-KIT at day 14<br>An increase in AFP, sol. c-KIT, SDF1 $\alpha$ , sVEGFR1, CPCs or IL-6 at any time-point - rapid progression and/or death | Zhu et al., J Clin Oncol, in press        |

Met, metastatic; BC, breast cancer; RCC, renal cell carcinoma; Bev, bevacizumab; HCC hepatocellular carcinoma; GIST, gastrointestinal stromal tumors; PIGF, placental-derived growth factor; VEGF, vascular endothelial growth factor; VEGFR, vascular endothelial growth factor receptor; Tx, treatment; DC, dendritic cell; PFS, progression-free survival; RR, response rate; OS, overall survival; AFP, alphafetoprotein; CPC, circulating progenitor cell; CECs, circulating endothelial cells; SDF1 $\alpha$ , stromal-derived growth factor 1 alpha

**Table S4: Current Biomarker Data for Sorafenib Therapy**

| Type of cancer | Tx                                        | Study Phase | Study size / Time-points                | Biomarker findings                                                                  | Reference                          |
|----------------|-------------------------------------------|-------------|-----------------------------------------|-------------------------------------------------------------------------------------|------------------------------------|
| Met RCC        | Sorafenib mono (200 or 400 mg) vs placebo | II          | 44 pts, pre and post (28 d)             | High baseline Ktrans - better PFS<br>Ktrans change at 4 weeks not predictive of PFS | Hahn et al., J Clin Oncol 2008     |
| Met PC         | Sorafenib mono                            | II          | n = 22 pre and post (after every cycle) | PSA- not a good predictor of response                                               | Dahut et al., Clin Cancer Res 2008 |
| Met RCC        | Sorafenib + IFN $\alpha$                  | II          | n = 80 Baseline                         | Higher VEGF and PDGF - longer PFS                                                   | Tannir et al, ASCO 2008            |
| HCC            | Sorafenib mono                            | II          | n = 33 Baseline                         | pERK correlated significantly with TTP                                              | Abou-Alfa et al, J Clin Oncol 2006 |

Met, metastatic; PC, prostate cancer; RCC, renal cell carcinoma; Bev, bevacizumab; HCC hepatocellular carcinoma; VEGF, vascular endothelial growth factor; PDGF, platelet-derived growth factor; Tx, treatment; PSA, prostate-specific antigen; PFS, progression-free survival; TTP, time-to-progression

**Table S5: Current Biomarker Data for Experimental Antiangiogenic Agents**

| Type of cancer      | Tx                           | Study Phase | Study size / Time-points                                  | Biomarker findings                                                                                                                                                                                                                                                            | Reference                     |
|---------------------|------------------------------|-------------|-----------------------------------------------------------|-------------------------------------------------------------------------------------------------------------------------------------------------------------------------------------------------------------------------------------------------------------------------------|-------------------------------|
| NSCLC               | Vandetanib with chemotherapy | II          | n = 207<br>Baseline                                       | Low baseline VEGF - lower risk of PD when treated with vandetanib vs gefitinib<br>Low baseline VEGF - lower risk of PD when treated with vandetanib + docetaxel vs docetaxel                                                                                                  | Heymach et al., ASCO 2008     |
| NSCLC               | Neoadjuvant pazopanib        | I           | n = 19<br>pre and post (pre-surgery)                      | PIGF, IFN- $\alpha$ 2, HGF, SDF1 $\alpha$ , CTACK, CXCL-10, CXCL-9, RANTES, IL-12; M-CSF and TRAIL increased and sVEGFR2 decreased<br>Correlation between sVEGFR-2 changes during pazopanib treatment and tumor shrinkage                                                     | Nikolinakos et al., ASCO 2008 |
| rGBM                | Cediranib                    | II          | n = 31<br>pre and post (days 1, 2, 9, 28, 56, 84 and 112) | SDF1 $\alpha$ , VEGF and PIGF increased and sVEGFR2 and CPCs decreased in circulation<br>Patients with clinical benefit had significantly greater decreases in Ktrans, collagen IV and CECs at day 2<br>Progression was associated with an increase in SDF1 $\alpha$ and bFGF | Batchelor et al., ASCO 2008   |
| Multiple carcinomas | Axitinib                     | II          | n = 298<br>pre and post (every week, 2-weeks or 4-weeks)  | Patients with dBP of equal to or more than 90 mmHg after axitinib showed significantly longer OS                                                                                                                                                                              | Rini et al., ASCO 2008        |

\*except for patients with advanced pancreatic cancer, who also received Gemcitabine

Met, metastatic; NSCLC, non-small cell lung carcinoma; rGBM, recurrent glioblastoma; PIGF, placental-derived growth factor; VEGF, vascular endothelial growth factor; VEGFR, vascular endothelial growth factor receptor; IFN $\alpha$ 2, interferon alpha 2; IL-12, interleukin 12; Tx, treatment; PD, progressive disease; OS, overall survival; CPC, circulating progenitor cell; CECs, circulating endothelial cells; SDF1 $\alpha$ , stromal-derived growth factor 1 alpha; dBP, diastolic blood pressure
